# Supplementary material for: Co-Expression Analysis of Airway Epithelial Transcriptome in Asthma Patients with Eosinophilic vs. Non-Eosinophilic Airway Infiltration
Source: MDPI journal article supplement (doi:10.3390/ijms24043789), 2023-02-14

# Co-expression analysis of airway epithelial transcriptome in asthma patients with eosinophilic vs. non-eosinophilic airway infiltration

Pawel Kozlik-Siwi<sup>1</sup>, Sylwia Buregwa-Czuma<sup>2</sup>, Izabela Zawlik<sup>3</sup>, Aleksander Myszk<sup>3</sup>, Joanna Zuk<sup>1</sup>, Andzelika Siwi<sup>1</sup>, Jacek Zarychta<sup>1,4</sup>, Krzysztof Okon<sup>5</sup>, Lech Zareba<sup>2</sup>, Jerzy Soja<sup>1</sup>, Michał Kępski<sup>2</sup>, Jan G. Bazan<sup>2\*</sup>, Stanisława Bazan-Socha<sup>1\*</sup>

## Supplementary material

### Supplementary Table S1. Biological processes associated with genes differentially co-expressed between eosinophilic and non-eosinophilic asthma in bronchial brush biopsy samples.

Gene ontology derived from GO Biological Process 2018 by Gene Ontology Consortium.

Note: adjusted p-values >0.05.

| Biological process                                                       | Gene ontologu accession number | Genes                           | p-value | z-score | combined log(p-value)*z-score |
|--------------------------------------------------------------------------|--------------------------------|---------------------------------|---------|---------|-------------------------------|
| Rho protein signal transduction                                          | GO:0007266                     | <i>EPS8L1</i><br><i>RHOBTB2</i> | 0.00591 | -39.98  | 89.1                          |
| regulation of T cell tolerance induction                                 | GO:0002664                     | <i>CLC</i>                      | 0.00956 | -239.9  | 484                           |
| negative regulation of myeloid cell apoptotic process                    | GO:0033033                     | <i>MAEA</i>                     | 0.00956 | -239.9  | 484                           |
| regulation of cytokine production involved in immune response            | GO:0002718                     | <i>CLC</i>                      | 0.00956 | -239.9  | 484                           |
| hemostasis                                                               | GO:0007599                     | <i>GPI</i>                      | 0.01115 | -205.6  | 401                           |
| folic acid transport                                                     | GO:0015884                     | <i>SLC19A1</i>                  | 0.01115 | -205.6  | 401                           |
| positive regulation of protein localization to Cajal body                | GO:1904871                     | <i>CCT7</i>                     | 0.01273 | -179.9  | 341                           |
| regulation of protein localization to Cajal body                         | GO:1904869                     | <i>CCT7</i>                     | 0.01273 | -179.9  | 341                           |
| regulation of T cell mediated immunity                                   | GO:0002709                     | <i>CLC</i>                      | 0.01273 | -179.9  | 341                           |
| positive regulation of establishment of protein localization to telomere | GO:1904851                     | <i>CCT7</i>                     | 0.01431 | -159.9  | 295                           |
| regulation of immunoglobulin secretion                                   | GO:0051023                     | <i>GPI</i>                      | 0.01431 | -159.9  | 295                           |
| positive regulation of immunoglobulin secretion                          | GO:0051024                     | <i>GPI</i>                      | 0.01431 | -159.9  | 295                           |
| potassium ion import across plasma membrane                              | GO:1990573                     | <i>ATP1B1</i>                   | 0.01431 | -159.9  | 295                           |
| thyroid hormone generation                                               | GO:0006590                     | <i>DIO3</i>                     | 0.01589 | -143.9  | 259                           |

|                                                                             |            |                                                  |         |        |      |
|-----------------------------------------------------------------------------|------------|--------------------------------------------------|---------|--------|------|
| regulation of establishment of protein localization to telomere             | GO:0070203 | <i>CCT7</i>                                      | 0.01589 | -143.9 | 259  |
| cardiac muscle cell membrane repolarization                                 | GO:0099622 | <i>ATP1B1</i>                                    | 0.01746 | -130.8 | 230  |
| membrane repolarization during action potential                             | GO:0086011 | <i>ATP1B1</i>                                    | 0.01746 | -130.8 | 230  |
| import across plasma membrane                                               | GO:0098739 | <i>ATP1B1</i>                                    | 0.01746 | -130.8 | 230  |
| relaxation of muscle                                                        | GO:0090075 | <i>ATP1B1</i>                                    | 0.01746 | -130.8 | 230  |
| positive regulation of sodium ion transmembrane transporter activity        | GO:2000651 | <i>ATP1B1</i>                                    | 0.01746 | -130.8 | 230  |
| relaxation of cardiac muscle                                                | GO:0055119 | <i>ATP1B1</i>                                    | 0.01746 | -130.8 | 230  |
| positive regulation of protein localization to chromosome, telomeric region | GO:1904816 | <i>CCT7</i>                                      | 0.01746 | -130.8 | 230  |
| positive regulation of potassium ion transmembrane transporter activity     | GO:1901018 | <i>ATP1B1</i>                                    | 0.01904 | -119.9 | 206  |
| positive regulation of establishment of protein localization                | GO:1904951 | <i>CCT7</i>                                      | 0.01904 | -119.9 | 206  |
| positive regulation of ruffle assembly                                      | GO:1900029 | <i>EPS8L1</i>                                    | 0.01904 | -119.9 | 206  |
| sodium ion export                                                           | GO:0071436 | <i>ATP1B1</i>                                    | 0.02061 | -110.7 | 187  |
| cellular potassium ion homeostasis                                          | GO:0030007 | <i>ATP1B1</i>                                    | 0.02061 | -110.7 | 187  |
| sodium ion export from cell                                                 | GO:0036376 | <i>ATP1B1</i>                                    | 0.02061 | -110.7 | 187  |
| regulation of T cell cytokine production                                    | GO:0002724 | <i>CLC</i>                                       | 0.02061 | -110.7 | 187  |
| membrane repolarization                                                     | GO:0086009 | <i>ATP1B1</i>                                    | 0.02061 | -110.7 | 187  |
| transmembrane transport                                                     | GO:0055085 | <i>STOML3</i><br><i>ATP1B1</i><br><i>SLC19A1</i> | 0.02215 | -11.42 | 18.9 |
| modified amino acid transport                                               | GO:0072337 | <i>SLC19A1</i>                                   | 0.02218 | -102.8 | 170  |
| cell communication by electrical coupling involved in cardiac conduction    | GO:0086064 | <i>ATP1B1</i>                                    | 0.02218 | -102.8 | 170  |
| clathrin coat assembly                                                      | GO:0048268 | <i>EPS15</i>                                     | 0.02218 | -102.8 | 170  |
| establishment or maintenance of actin cytoskeleton polarity                 | GO:0030950 | <i>RHOBTB2</i>                                   | 0.02218 | -102.8 | 170  |
| positive regulation of telomerase RNA localization to Cajal body            | GO:1904874 | <i>CCT7</i>                                      | 0.02374 | -95.94 | 156  |
| amide transport                                                             | GO:0042886 | <i>SLC19A1</i>                                   | 0.02374 | -95.94 | 156  |

|                                                                       |            |                              |         |        |      |
|-----------------------------------------------------------------------|------------|------------------------------|---------|--------|------|
| cofactor transport                                                    | GO:0051181 | <i>SLC19A1</i>               | 0.02374 | -95.94 | 156  |
| cellular sodium ion homeostasis                                       | GO:0006883 | <i>ATP1B1</i>                | 0.02374 | -95.94 | 156  |
| negative regulation of RNA metabolic process                          | GO:0051253 | <i>RPS13</i>                 | 0.02374 | -95.94 | 156  |
| membrane repolarization during cardiac muscle cell action potential   | GO:0086013 | <i>ATP1B1</i>                | 0.02374 | -95.94 | 156  |
| positive regulation of potassium ion transmembrane transport          | GO:1901381 | <i>ATP1B1</i>                | 0.02374 | -95.94 | 156  |
| protein stabilization                                                 | GO:0050821 | <i>CCT7</i><br><i>ATP1B1</i> | 0.02452 | -18.94 | 30.5 |
| cellular monovalent inorganic cation homeostasis                      | GO:0030004 | <i>ATP1B1</i>                | 0.02687 | -84.65 | 133  |
| positive regulation of calcium ion transmembrane transporter activity | GO:1901021 | <i>ATP1B1</i>                | 0.02687 | -84.65 | 133  |
| viral entry into host cell                                            | GO:0046718 | <i>EPS15</i>                 | 0.02687 | -84.65 | 133  |
| regulation of cellular response to growth factor stimulus             | GO:0090287 | <i>FBN3</i>                  | 0.02842 | -79.95 | 124  |
| negative regulation of RNA splicing                                   | GO:0033119 | <i>RPS13</i>                 | 0.02842 | -79.95 | 124  |
| regulation of telomerase RNA localization to Cajal body               | GO:1904872 | <i>CCT7</i>                  | 0.02842 | -79.95 | 124  |
| drug transport                                                        | GO:0015893 | <i>SLC19A1</i>               | 0.02998 | -75.74 | 115  |
| folic acid metabolic process                                          | GO:0046655 | <i>SLC19A1</i>               | 0.02998 | -75.74 | 115  |
| positive regulation of immunoglobulin production                      | GO:0002639 | <i>GPI</i>                   | 0.02998 | -75.74 | 115  |
| Golgi to endosome transport                                           | GO:0006895 | <i>EPS15</i>                 | 0.03153 | -71.96 | 108  |
| regulation of ruffle assembly                                         | GO:1900027 | <i>EPS8L1</i>                | 0.03308 | -68.53 | 101  |
| regulation of cardiac muscle contraction by calcium ion signaling     | GO:0010882 | <i>ATP1B1</i>                | 0.03308 | -68.53 | 101  |
| vitamin transport                                                     | GO:0051180 | <i>SLC19A1</i>               | 0.03618 | -62.57 | 90.2 |
| folic acid-containing compound metabolic process                      | GO:0006760 | <i>SLC19A1</i>               | 0.03618 | -62.57 | 90.2 |
| positive regulation of ion transmembrane transporter activity         | GO:0032414 | <i>ATP1B1</i>                | 0.03618 | -62.57 | 90.2 |
| glycolytic process through glucose-6-phosphate                        | GO:0061620 | <i>GPI</i>                   | 0.03926 | -57.56 | 80.9 |
| canonical glycolysis                                                  | GO:0061621 | <i>GPI</i>                   | 0.03926 | -57.56 | 80.9 |
| regulation of potassium ion transmembrane transporter activity        | GO:1901016 | <i>ATP1B1</i>                | 0.03926 | -57.56 | 80.9 |
| potassium ion homeostasis                                             | GO:0055075 | <i>ATP1B1</i>                | 0.03926 | -57.56 | 80.9 |

|                                                            |            |                                 |         |        |      |
|------------------------------------------------------------|------------|---------------------------------|---------|--------|------|
| glucose catabolic process to pyruvate                      | GO:0061718 | <i>GPI</i>                      | 0.03926 | -57.56 | 80.9 |
| sodium ion homeostasis                                     | GO:0055078 | <i>ATP1B1</i>                   | 0.0408  | -55.35 | 76.9 |
| endocytic recycling                                        | GO:0032456 | <i>EPS15</i>                    | 0.04234 | -53.3  | 73.2 |
| regulation of actin polymerization or depolymerization     | GO:0008064 | <i>EPS8L1</i>                   | 0.04387 | -51.4  | 69.8 |
| cardiac muscle cell action potential                       | GO:0086001 | <i>ATP1B1</i>                   | 0.04541 | -49.62 | 66.6 |
| dicarboxylic acid transport                                | GO:0006835 | <i>SLC19A1</i>                  | 0.04541 | -49.62 | 66.6 |
| regulation of activated T cell proliferation               | GO:0046006 | <i>CLC</i>                      | 0.04541 | -49.62 | 66.6 |
| regulation of protein polymerization                       | GO:0032271 | <i>EPS8L1</i>                   | 0.04694 | -47.97 | 63.7 |
| ion transmembrane transport                                | GO:0034220 | <i>STOML3</i><br><i>ATP1B1</i>  | 0.04775 | -13.14 | 17.4 |
| Ras protein signal transduction                            | GO:0007265 | <i>EPS8L1</i><br><i>RHOBTB2</i> | 0.04932 | -12.91 | 16.9 |
| positive regulation of telomere maintenance via telomerase | GO:0032212 | <i>CCT7</i>                     | 0.04999 | -44.97 | 58.5 |
| purine ribonucleoside triphosphate metabolic process       | GO:0009205 | <i>ATP1B1</i>                   | 0.04999 | -44.97 | 58.5 |

**Supplementary Table S2. Molecular functions associated with genes differentially co-expressed between eosinophilic and non-eosinophilic asthma in bronchial brush biopsy samples.**

Gene ontology derived from GO Molecular Function 2018 by Gene Ontology Consortium.

Note: adjusted p-values >0.05.

| Molecular function                                                 | Gene ontology accession number | Genes         | p-value | z-score | combined log(p-value)*z-score |
|--------------------------------------------------------------------|--------------------------------|---------------|---------|---------|-------------------------------|
| T cell receptor binding                                            | GO:0042608                     | <i>EPS8L1</i> | 0.00956 | -239.85 | 484.4                         |
| small ribosomal subunit rRNA binding                               | GO:0070181                     | <i>RPS13</i>  | 0.01115 | -205.59 | 401.5                         |
| signal recognition particle binding                                | GO:0005047                     | <i>SRPRB</i>  | 0.01273 | -179.89 | 340.9                         |
| armadillo repeat domain binding                                    | GO:0070016                     | <i>STRN4</i>  | 0.01431 | -159.9  | 294.9                         |
| potassium-transporting ATPase activity                             | GO:0008556                     | <i>ATP1B1</i> | 0.01746 | -130.83 | 230                           |
| sodium:potassium-exchanging ATPase activity                        | GO:0005391                     | <i>ATP1B1</i> | 0.01746 | -130.83 | 230                           |
| sodium ion binding                                                 | GO:0031402                     | <i>ATP1B1</i> | 0.01904 | -119.93 | 206.3                         |
| metalloendopeptidase inhibitor activity                            | GO:0008191                     | <i>RECK</i>   | 0.01904 | -119.93 | 206.3                         |
| potassium ion binding                                              | GO:0030955                     | <i>ATP1B1</i> | 0.01904 | -119.93 | 206.3                         |
| Rac guanyl-nucleotide exchange factor activity                     | GO:0030676                     | <i>EPS8L1</i> | 0.02218 | -102.79 | 170                           |
| alkali metal ion binding                                           | GO:0031420                     | <i>ATP1B1</i> | 0.0253  | -89.945 | 143.6                         |
| MHC class II protein complex binding                               | GO:0023026                     | <i>ATP1B1</i> | 0.0253  | -89.945 | 143.6                         |
| cysteine-type endopeptidase activity involved in apoptotic process | GO:0097153                     | <i>CLC</i>    | 0.0253  | -89.945 | 143.6                         |
| MHC protein complex binding                                        | GO:0023023                     | <i>ATP1B1</i> | 0.02998 | -75.743 | 115.4                         |
| lysophospholipase activity                                         | GO:0004622                     | <i>CLC</i>    | 0.02998 | -75.743 | 115.4                         |
| protein phosphatase 2A binding                                     | GO:0051721                     | <i>STRN4</i>  | 0.03153 | -71.956 | 108                           |
| mRNA 5'-UTR binding                                                | GO:0048027                     | <i>RPS13</i>  | 0.03463 | -65.414 | 95.5                          |
| ATPase activator activity                                          | GO:0001671                     | <i>ATP1B1</i> | 0.03618 | -62.57  | 90.2                          |

**Supplementary Table S3. Signaling pathways associated with transcription factors from the regulatory network of genes differentially co-expressed between eosinophilic and non-eosinophilic asthma in bronchial brush biopsy samples.**

| Signaling pathway                                                          | Associated transcription factors                                                                                                                                                | p-value  | q-value  | z-score | combined<br>log(p-value)<br>*z-score |
|----------------------------------------------------------------------------|---------------------------------------------------------------------------------------------------------------------------------------------------------------------------------|----------|----------|---------|--------------------------------------|
| Regulation of nuclear SMAD2/3 signaling                                    | CEBPB; HDAC1; GATA3; NR3C1; FOXO3; SIN3B; HNF4A; MYC; EP300; E2F4; E2F5; SMAD2; JUN; SMAD4; SMAD3; VDR; TFE3; ESR1; RUNX2; RUNX1; AR; NCOR1; CREB1; TFDPI; SP1; SP3; TCF3; ATF3 | 8.73E-37 | 1.82E-34 | -83.78  | 3021.193231                          |
| AP-1 transcription factor network                                          | EGR1; JUN; NR3C1; GATA2; ETS1; HIF1A; ESR1; FOSL1; CREB1; CCND1; SP1; MYC; EP300; CTNNB1; TP53; ATF3                                                                            | 2.86E-18 | 2.99E-16 | -56.20  | 986.0307212                          |
| E2F transcription factor network                                           | HDAC1; TFE3; BRCA1; HIC1; YY1; TFDPI; TRIM28; SP1; MYC; E2F1; EP300; MYBL2; HBP1; E2F4; E2F5; E2F6                                                                              | 6.00E-18 | 4.18E-16 | -53.86  | 927.6012899                          |
| Notch-mediated HES/HEY network                                             | HDAC1; STAT3; ARNT; GATA4; RBPJ; HIF1A; GATA1; RUNX2; YY1; AR; NCOR1; E2F1; EP300; TCF3                                                                                         | 1.09E-17 | 5.70E-16 | -70.69  | 1199.092417                          |
| Validated targets of C-MYC transcriptional repression                      | SMAD2; SMAD4; SPI1; SMAD3; NFYA; HDAC1; NFYC; BRCA1; FOXO3; CREB1; CCND1; SP1; MYC; EP300                                                                                       | 7.48E-16 | 3.13E-14 | -53.86  | 814.7221182                          |
| Glucocorticoid receptor regulatory network                                 | EGR1; JUN; SPI1; HDAC1; GATA3; NR3C1; RELA; NFKB1; PBX1; SMARCA4; NR4A1; CREB1; IRF1; EP300; TP53                                                                               | 1.51E-15 | 5.27E-14 | -44.34  | 657.0726358                          |
| Regulation of nuclear beta catenin signaling and target gene transcription | JUN; HDAC1; LEF1; MITF; KLF4; SMARCA4; AR; CCND1; MYC; SALL4; EP300; CTNNB1; HBP1; TCF4                                                                                         | 2.18E-14 | 6.51E-13 | -42.95  | 586.7956942                          |
| Regulation of retinoblastoma protein                                       | CEBPB; JUN; SPI1; HDAC1; MITF; RUNX2; SMARCA4; TFDPI; CCND1; E2F1; EP300; PPARG; E2F4                                                                                           | 2.92E-14 | 7.62E-13 | -49.23  | 666.3598742                          |

|                                                                   |                                                                                       |          |          |        |             |
|-------------------------------------------------------------------|---------------------------------------------------------------------------------------|----------|----------|--------|-------------|
| Regulation of Telomerase                                          | JUN; SMAD3; HDAC1; ESR1; NFKB1; CCND1; SIN3B; WT1; SP1; MYC; IRF1; SP3; E2F1          | 5.50E-14 | 1.28E-12 | -47.03 | 623.584993  |
| FOXA1 transcription factor network                                | FOXA1; AR; CEBPB; JUN; NFIA; SP1; NFIC; EP300; BRCA1; ESR1; FOXA2                     | 2.48E-13 | 5.18E-12 | -60.59 | 763.8201229 |
| C-MYB transcription factor network                                | CEBPB; SPI1; NCOR1; CCND1; TRIM28; SP1; MYC; LEF1; EP300; GATA3; ETS1; GATA1          | 1.77E-11 | 3.36E-10 | -35.47 | 381.3941217 |
| Validated nuclear estrogen receptor alpha network                 | CEBPB; JUN; SMAD4; NCOR1; CCND1; HDAC1; MYC; EP300; BRCA1; ESR1; ESR2                 | 2.04E-11 | 3.55E-10 | -41.66 | 445.3469976 |
| Signaling events mediated by HDAC Class I                         | YY1; NCOR1; SIN3B; HDAC1; STAT3; EP300; PPARG; GATA2; GATA1; RELA; NFKB1              | 2.90E-11 | 4.66E-10 | -40.40 | 425.6891794 |
| HIF-1-alpha transcription factor network                          | JUN; SMAD4; CREB1; SMAD3; SP1; HNF4A; EP300; ARNT; GATA2; ETS1; HIF1A                 | 2.90E-11 | 4.33E-10 | -40.40 | 425.6891794 |
| Direct p53 effectors                                              | FOXA1; JUN; NFYA; VDR; NFYC; HIC1; SMARCA4; TFDPI; SP1; E2F1; EP300; TP53; TP63; ATF3 | 4.65E-11 | 6.48E-10 | -24.95 | 257.7948324 |
| Regulation of Androgen receptor activity                          | AR; EGR1; JUN; HDAC1; EP300; SRY; NR3C1; NR2C2; GATA2                                 | 1.35E-09 | 1.76E-08 | -41.95 | 372.1071412 |
| Signaling mediated by p38-alpha and p38-beta                      | ATF1; CEBPB; JUN; CREB1; MITF; HBP1; ESR1; TP53                                       | 2.19E-09 | 2.70E-08 | -51.03 | 441.8400253 |
| p73 transcription factor network                                  | YAP1; WT1; SP1; MYC; HSF1; EP300; FOXO3; GATA1; TP63; RELA                            | 3.39E-09 | 3.94E-08 | -31.07 | 263.1731164 |
| Calcineurin-regulated NFAT-dependent transcription in lymphocytes | FOSL1; EGR1; JUN; IRF4; E2F1; PPARG; GATA3; FOXP3                                     | 1.10E-08 | 1.21E-07 | -42.15 | 335.5324137 |
| RXR and RAR heterodimerization with other nuclear receptor        | SREBF1; NR4A1; VDR; RARA; PPARG; PPARD                                                | 7.93E-08 | 8.29E-07 | -60.59 | 430.2696264 |
| Notch signaling pathway                                           | YY1; NCOR1; CCND1; HDAC1; MYC; EP300; GATA3; RBPJ                                     | 8.39E-08 | 8.35E-07 | -32.86 | 232.5624802 |

|                                                                       |                                               |          |          |        |             |
|-----------------------------------------------------------------------|-----------------------------------------------|----------|----------|--------|-------------|
| FOXA2 and FOXA3 transcription factor networks                         | FOXA1; CEBPB; CREB1; SP1; HNF4A; NR3C1; FOXA2 | 2.09E-07 | 1.99E-06 | -37.70 | 251.8464888 |
| Presenilin action in Notch and Wnt signaling                          | JUN; CCND1; HDAC1; MYC; CTNNB1; RBPJ; PPARD   | 2.45E-07 | 2.22E-06 | -36.88 | 243.8556084 |
| HIF-2-alpha transcription factor network                              | SP1; EP300; ARNT; ETS1; ELK1; POU5F1          | 7.32E-07 | 6.38E-06 | -42.77 | 262.4281795 |
| Validated transcriptional targets of AP1 family members Fra1 and Fra2 | FOSL1; JUN; CCND1; SP1; EP300; USF2           | 8.77E-07 | 7.33E-06 | -41.55 | 251.6791655 |
| ATF-2 transcription factor network                                    | JUN; CREB1; CCND1; EP300; BRCA1; ESR1; ATF3   | 1.25E-06 | 1.00E-05 | -29.25 | 172.697571  |
| FOXO1 transcription factor network                                    | CCND1; SP1; MYC; EP300; FOXO1; ESR1           | 1.99E-06 | 1.54E-05 | -36.36 | 207.2522483 |
| Validated transcriptional targets of deltaNp63 isoforms               | YAP1; VDR; HBP1; POU2F2; TP63; RUNX1          | 4.07E-06 | 3.03E-05 | -32.32 | 174.2178406 |
| IL6-mediated signaling events                                         | CEBPB; JUN; MYC; IRF1; STAT3; MITF            | 4.64E-06 | 3.34E-05 | -31.61 | 168.6197375 |
| Validated transcriptional targets of TAp63 isoforms                   | TFAP2C; VDR; SP1; EP300; HBP1; TP63           | 1.08E-05 | 7.50E-05 | -27.44 | 136.3231851 |
| Signaling events mediated by HDAC Class II                            | BCOR; NR3C1; GATA2; GATA1; ESR1               | 1.63E-05 | 1.10E-04 | -35.64 | 170.6272481 |
| IL2 signaling events mediated by PI3K                                 | MYC; E2F1; FOXO3; RELA; NFKB1                 | 1.89E-05 | 1.23E-04 | -34.63 | 163.549873  |
| BCR signaling pathway                                                 | JUN; POU2F2; ETS1; ELK1; RELA; NFKB1          | 3.22E-05 | 2.04E-04 | -22.72 | 102.0670923 |
| Integrin-linked kinase signaling                                      | JUN; ZEB1; CREB1; CCND1; CTNNB1               | 6.59E-05 | 4.05E-04 | -26.93 | 112.6035437 |
| LKB1 signaling events                                                 | SMAD4; CREB1; MYC; ESR1; TP53                 | 8.15E-05 | 4.86E-04 | -25.78 | 105.4357932 |
| Validated targets of C-MYC transcriptional activation                 | FOSL1; SMAD4; SMAD3; MYC; EP300; TP53         | 1.06E-04 | 6.17E-04 | -18.41 | 73.15299554 |



|                                                          |                                     |          |          |        |             |
|----------------------------------------------------------|-------------------------------------|----------|----------|--------|-------------|
| Retinoic acid receptors-mediated signaling               | HDAC1; VDR; RARA; EP300             | 1.35E-04 | 7.63E-04 | -34.63 | 133.9714725 |
| TGF-beta receptor signaling                              | YAP1; SMAD2; SMAD4; SMAD3; CTNNB1   | 1.59E-04 | 8.75E-04 | -22.44 | 85.23980904 |
| CD40/CD40L signaling                                     | JUN; MYC; RELA; NFKB1               | 1.78E-04 | 9.55E-04 | -32.32 | 121.156723  |
| Coregulation of Androgen receptor activity               | AR; CCND1; CTNNB1; TCF4; BRCA1      | 2.42E-04 | 0.001267 | -20.54 | 74.26029048 |
| IL4-mediated signaling events                            | CEBPB; SPI1; IRF4; SP1; ETS1        | 2.63E-04 | 0.001338 | -20.20 | 72.32655319 |
| Trk receptor signaling mediated by PI3K and PLC-gamma    | EGR1; CREB1; CCND1; FOXO3           | 3.66E-04 | 0.001823 | -26.93 | 92.53414197 |
| Downstream signaling in naive CD8+ T cells               | EOMES; FOSL1; EGR1; JUN; ELK1       | 4.10E-04 | 0.001994 | -18.36 | 62.1904905  |
| ErbB1 downstream signaling                               | ATF1; EGR1; JUN; CREB1; STAT3; ELK1 | 5.02E-04 | 0.002383 | -13.85 | 45.70010227 |
| Regulation of cytoplasmic and nuclear SMAD2/3 signaling  | SMAD2; SMAD4; SMAD3                 | 5.20E-04 | 0.002416 | -42.77 | 140.4574345 |
| IFN-gamma pathway                                        | CEBPB; IRF1; STAT3; EP300           | 5.52E-04 | 0.002508 | -24.24 | 78.96896859 |
| Hypoxic and oxygen homeostasis regulation of HIF-1-alpha | ARNT; HIF1A; TP53                   | 6.20E-04 | 0.002757 | -40.40 | 129.57832   |
| Angiopoietin receptor Tie2-mediated signaling            | ETS1; ELK1; RELA; NFKB1             | 0.001108 | 0.004823 | -20.20 | 59.69672704 |
| Signaling events mediated by HDAC Class III              | EP300; FOXO3; TP53                  | 0.001868 | 0.007967 | -27.97 | 76.31116825 |
| p53 pathway                                              | YY1; TRIM28; EP300; TP53            | 0.002105 | 0.008797 | -17.01 | 45.53025547 |

**Supplementary Table S4. Impact of kinase perturbations in animal studies on genes differentially expressed between eosinophilic and non-eosinophilic asthma in bronchial brush biopsy samples.** Kinase perturbation studies data retrieved from Gene Expression Omnibus using Enrichr software. Only terms with p-value <0.05 are shown; p-values adjusted by Fisher's exact test >0.05.

| Affected kinase and study type                         | GEO accession number | Affected genes             | p-value | z-score | combined log(p-value) *z-score |
|--------------------------------------------------------|----------------------|----------------------------|---------|---------|--------------------------------|
| <i>Genes up-regulated due to kinase perturbation</i>   |                      |                            |         |         |                                |
| HIPK1 (knockout)                                       | GSE39253             | GPI<br>MAEA<br>STRN4       | 0.0120  | -14.39  | 27.63348                       |
| TGFBR2 (knockout)                                      | GSE22989             | MRPL14<br>CCT7<br>EPS15    | 0.0120  | -14.39  | 27.63348                       |
| <i>Genes down-regulated due to kinase perturbation</i> |                      |                            |         |         |                                |
| IKBKE (siRNA-mediated knockdown)                       | GSE27869             | C14ORF159<br>RAPH1<br>ASB3 | 0.0120  | -14.39  | 27.63348                       |

**Supplementary Table S5. Cell-type enrichment analysis of histone ChIP-seq peak marks of human cell lines**

**annotated within the Encyclopedia of DNA Elements (ENCODE).**

Note: adjusted p-values >0.05.

| Histone modification and cell line                | p-value  | Affected genes                                                 |
|---------------------------------------------------|----------|----------------------------------------------------------------|
| H3K9ac fibroblast of lung hg19                    | 0.035726 | ASB3; RADX; CCT7; MRPL14; PPP2R3B; RPS13; SLC19A1              |
| H3K27me3 fibroblast of lung hg19                  | 0.045305 | CLC; RADX; DIO3; EPS8L1; FADS6; FBN3; SLC19A1; SRCRB4D; STOML3 |
| H3K36me3 myocyte mm9                              | 0.054552 | ASB3;RPS13                                                     |
| H3K27me3 SK-N-SH hg19                             | 0.122431 | FBN3;FADS6;EPS8L1;DIO3;CLC;RADX                                |
| H3K9ac K562 hg19                                  | 0.166164 | FADS6;RAPH1;MRPL14;PPP2R3B;CCT7; ATP1B1;SRCRB4D;SLC19A1        |
| H3K4me1 G1E mm9                                   | 0.209147 | FADS6;RAPH1;EPS8L1;SRPRB;SRCRB4D; RECK                         |
| H3K9me3 A549 hg19                                 | 0.211366 | CABP5;ANKRD26P1;TTC3P1;DIO3; ATP1B1                            |
| H3K4me1 CD14-positive monocyte hg19               | 0.211366 | GPI;FADS6;EPS8L1;CCT7;RECK                                     |
| H2AFZ skeletal muscle myoblast hg19               | 0.211366 | FADS6;RAPH1;ASB3;SLC19A1;RHOBTB2                               |
| H3K9ac mammary epithelial cell hg19               | 0.211366 | EPS8L1;MRPL14;PPP2R3B;ASB3;RHOBTB2                             |
| H3K27me3 T-cell acute lymphoblastic leukemia hg19 | 0.211366 | GPI;STOML3;EPS8L1;SRCRB4D;STRN4                                |
| H3K27ac HepG2 hg19                                | 0.211366 | GPI;MAEA;RADX;CCT7;RPS13                                       |
| H3K27ac GM12878 hg19                              | 0.211366 | RAPH1;PPP2R3B;CCT7;ATP1B1;SLC19A1                              |
| H3K4me3 skeletal muscle myoblast hg19             | 0.211366 | MRPL14;PPP2R3B;RADX;CCT7;RPS13                                 |
| H3K27ac astrocyte hg19                            | 0.211366 | C14ORF159;ASB3;STRN4;RPS13;RHOBTB2                             |
| H3K27me3 myotube hg19                             | 0.211366 | FBN3;CABP5;EPS8L1;CLC;SRCRB4D                                  |
| H3K9me1 keratinocyte hg19                         | 0.211366 | GPI;MAEA;CCT7;RECK;STRN4                                       |
| H3K9ac CD14-positive monocyte hg19                | 0.211366 | RAPH1;EPS8L1;MRPL14;PPP2R3B;CCT7                               |

**Supplementary Table S6. Curated resources used in gene set enrichment analysis and construction of interaction networks.**

| Interactome                                     | Description                                                                                                                                                                             |
|-------------------------------------------------|-----------------------------------------------------------------------------------------------------------------------------------------------------------------------------------------|
| Libraries used for gene set enrichment analysis |                                                                                                                                                                                         |
| ENCODE histone modifications                    | Database of histone modification probed by ChIP-seq, ChIP-chip and qChIP studies <sup>123</sup>                                                                                         |
| GO Biological process                           | Library of gene associated with biological programs accomplished by multiple molecular activities <sup>124,125</sup>                                                                    |
| GO molecular function                           | Library of genes associated with molecular-level activities <sup>124,125</sup>                                                                                                          |
| PID                                             | The Pathway Interaction Database collection of curated and peer-reviewed pathways composed of human molecular signaling and regulatory events and key cellular processes <sup>126</sup> |
| Interactomes used for network construction      |                                                                                                                                                                                         |
| ENCODE                                          | Transcription factor and gene target data derived from the ENCODE ChIP-seq data <sup>127,128</sup>                                                                                      |
| JASPAR                                          | Transcription factor targets derived from the JASPAR TF binding site profile database <sup>129</sup>                                                                                    |
| ChEA                                            | Transcription factor targets database inferred from integrating literature curated Chip-X data <sup>130</sup>                                                                           |
| TF-miRNA coregulatory interactions              | RegNetwork repository <sup>131</sup>                                                                                                                                                    |

# Supplementary Figure S1. Gene regulatory network – transcription factor-gene interactions (JASPAR).

Transcription factor targets database inferred from integrating literature curated JASPAR data.

Green edges link to TFs targeting only DCGs up-regulated in EA, orange edges to TFs targeting DCGs upregulated in both EA and NEA, red edges – TFs targeting only DCGs upregulated in NEA.

Figure prepared using Cytoscape v. 3.7.1<sup>132</sup>, processed using Inkscape Project (202) Inkscape v. 1.0.2.

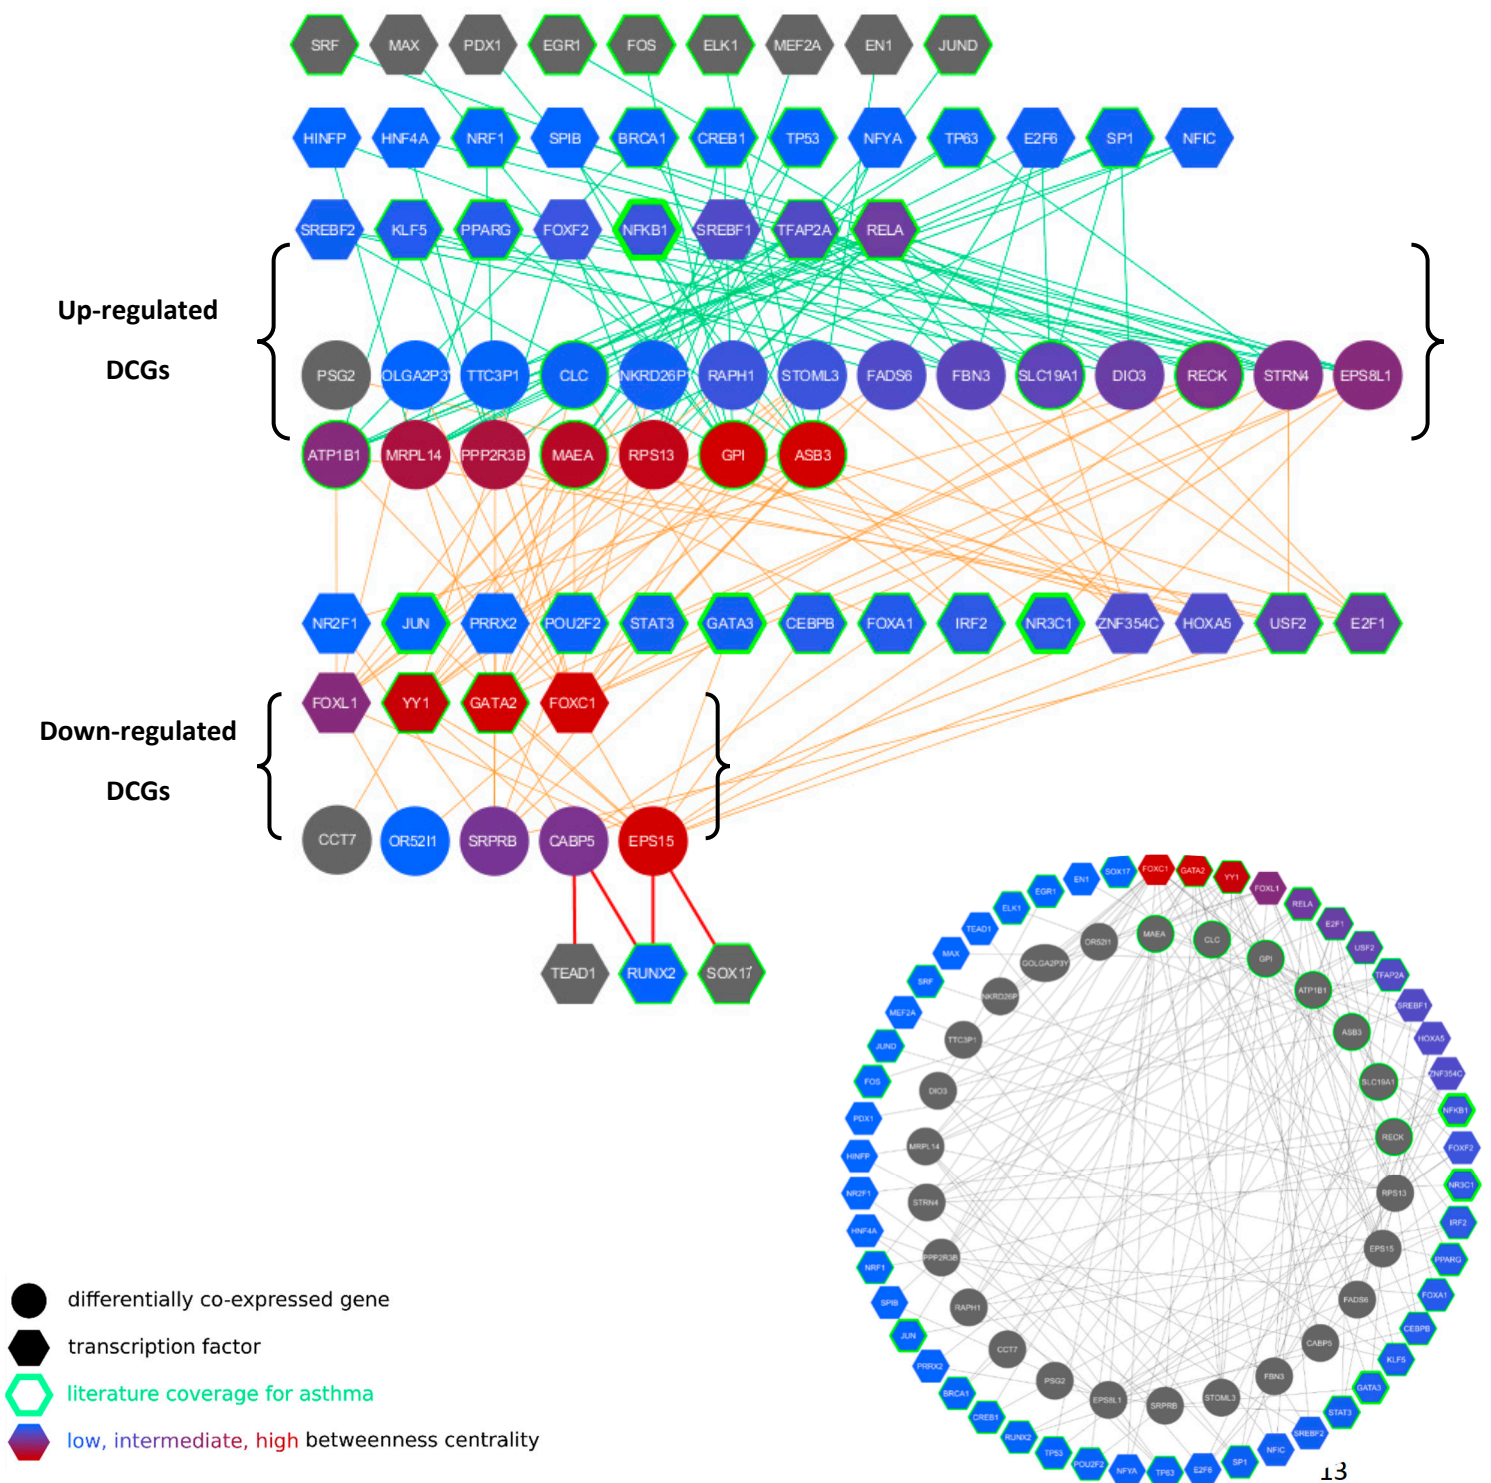



## Supplementary Figure S2. Gene regulatory network – transcription factor-gene interactions (Chip-X).

Transcription factor targets inferred from Chip-X curated database.

Figure prepared using Cytoscape v. 3.7.1<sup>132</sup>, processed using Inkscape Project (202) Inkscape v. 1.0.2.

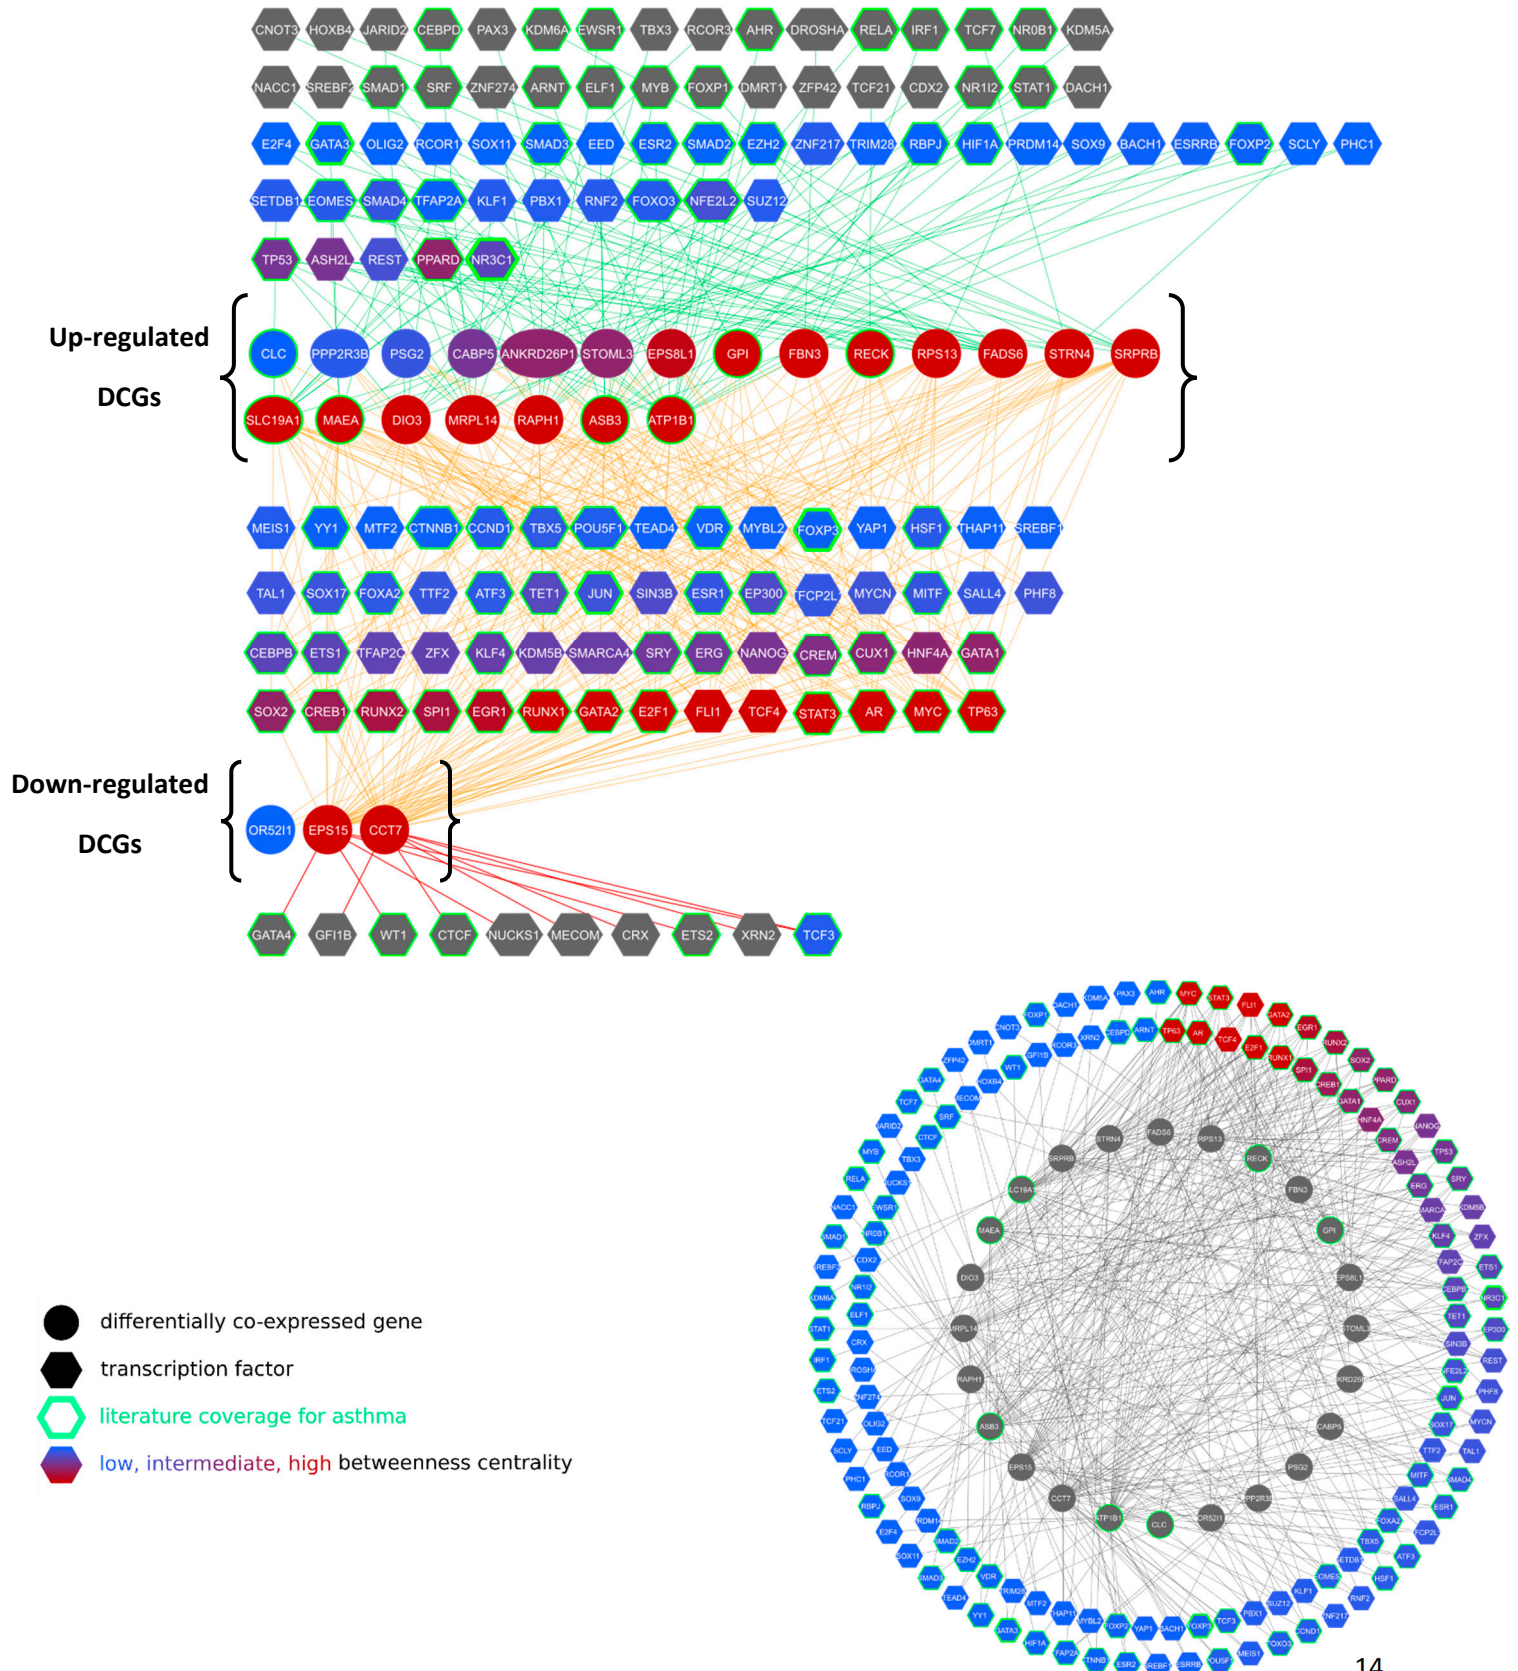

### Supplementary Figure S3. Gene regulatory network – transcription factor-gene interactions (ChIP-seq).

Transcription factor and gene target data derived from the ENCODE ChIP-seq data. Peak intensity signal <500, predicted regulatory potential score <1 (BETA minus algorithm).

Figure prepared using Cytoscape v. 3.7.1<sup>132</sup>, processed using Inkscape Project (202) Inkscape v. 1.0.2.

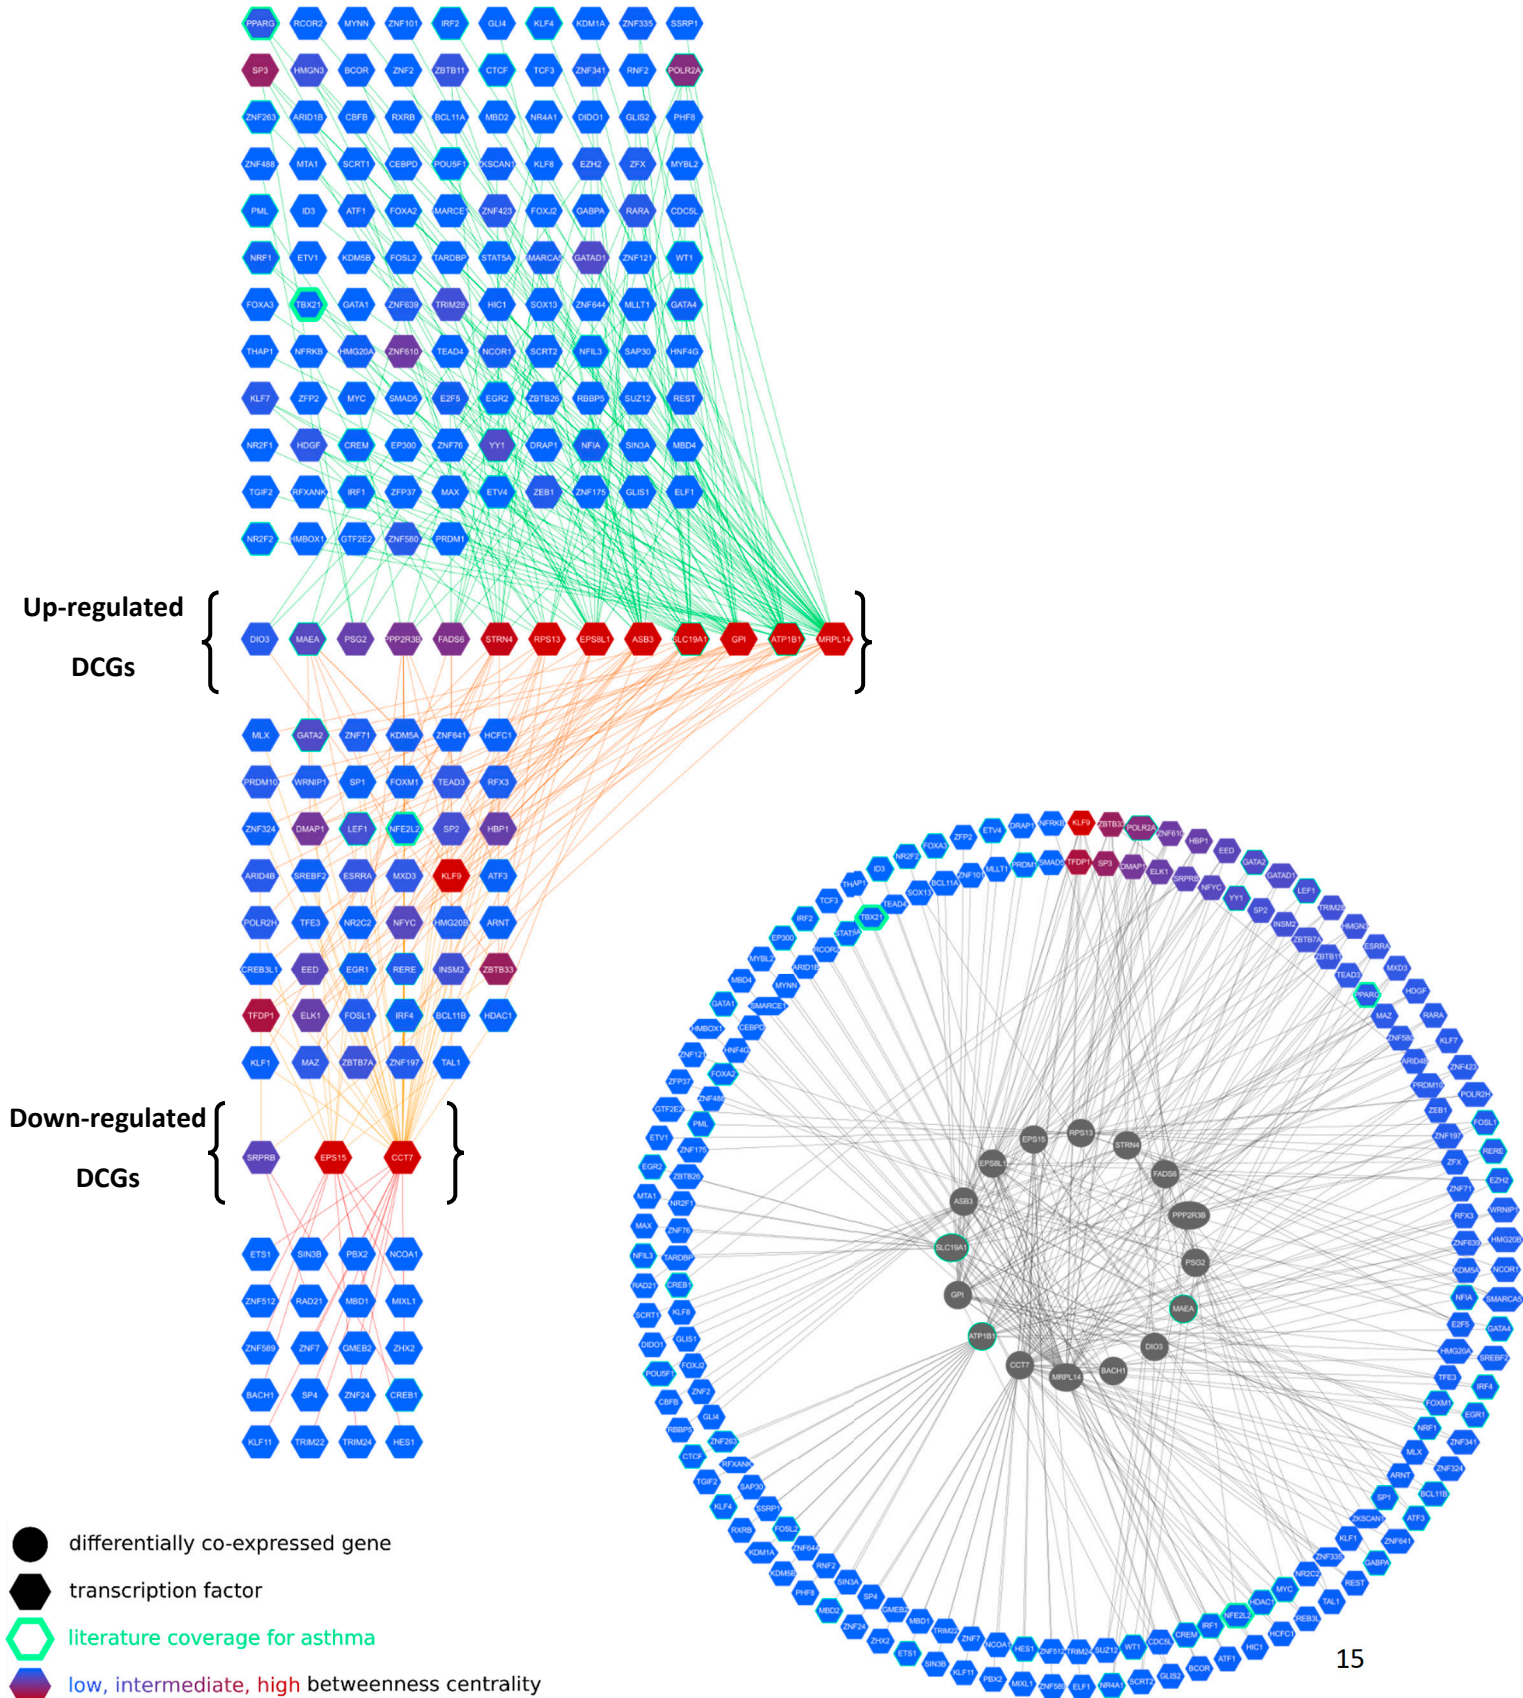

Supplement: s1 [file s1]
